# Supplementary material for: Metabarcoding assessment of the diet of an introduced continental lizard to an oceanic island reveals dietary niche conservatism
Source: Research Square preprint supplement (doi:10.21203/rs.3.rs-6830034/v1), 2025-06-20
Supplement: Supplementary file 1 [file b7bb7f720502d205e92eb5d1.xlsx]

## Sheet: Specimens Used
Table S1. Adult specimens of Agama picticauda used in this study.
Lab Code	Map Code	Country	Department	District	Place	Sex	Age	SVL	Weight
MR-ASP-038S	1	France	Reunion Island	La Possession	Grande Chaloupe	M	A	129	56
MR-ASP-042S	2	France	Reunion Island	Saint Leu	Piton Saint Leu	F	A	106	41
MR-ASP-043S	3	France	Reunion Island	Saint Leu	Piton Saint Leu	M	A	145	103
MR-ASP-044S	4	France	Reunion Island	Saint Leu	Piton Saint Leu	F	A	106	37
MR-ASP-048S	5	France	Reunion Island	Le Port	Le Port	F	A	112	49
MR-ASP-049S	6	France	Reunion Island	Le Port	Le Port	M	A	135	87
MR-ASP-051S	7	France	Reunion Island	Sainte Marie	Duparc	M	A	134	75
MR-ASP-052S	8	France	Reunion Island	Sainte Marie	Duparc	M	A	118	44
MR-ASP-059S	9	France	Reunion Island	Saint Leu	Saint Leu	M	A	138	81
MR-ASP-060S	10	France	Reunion Island	Saint Leu	Saint Leu	F	A	109	35
MR-ASP-069S	11	France	Reunion Island	Petite Ile	Petite Ile	F	A	113	42
MR-ASP-070S	12	France	Reunion Island	Petite Ile	Petite Ile	F	A	112	42
MR-ASP-071S	13	France	Reunion Island	Sainte Rose	Sainte Rose	F	A	111	46
MR-ASP-072S	14	France	Reunion Island	Sainte Rose	Sainte Rose	F	A	106	47
MR-ASP-075S	15	France	Reunion Island	Sainte Rose	Sainte Rose	F	A	109	39
MR-ASP-077S	16	France	Reunion Island	Sainte Rose	Sainte Rose	F	A	102	37
MR-ASP-080S	17	France	Reunion Island	Petite Ile	Petite Ile	F	A	129	61
MR-ASP-081S	18	France	Reunion Island	Petite Ile	Petite Ile	F	A	111	41
MR-ASP-084S	19	France	Reunion Island	Le Port	Le Port	M	A	105	31
MR-ASP-092S	20	France	Reunion Island	Sainte Marie	Duparc	M	A	141	90
MR-ASP-093S	21	France	Reunion Island	Sainte Marie	Duparc	M	A	136	76
MR-ASP-097S	22	France	Reunion Island	Saint Paul	Boucan Canot	M	A	120	51
MR-ASP-099S	23	France	Reunion Island	Saint Paul	Boucan Canot	M	A	111	40
MR-ASP-100S	24	France	Reunion Island	Saint Paul	Boucan Canot	F	A	109	35
MR-ASP-101S	25	France	Reunion Island	Saint Paul	Boucan Canot	F	A	106	47
MR-ASP-102S	26	France	Reunion Island	Saint Paul	Boucan Canot	M	A	133	78
MR-ASP-103S	27	France	Reunion Island	Saint Paul	Boucan Canot	M	A	152	102
MR-ASP-106S	28	France	Reunion Island	Saint Denis	Trinite	M	A	131	70
MR-ASP-107S	29	France	Reunion Island	Saint Denis	Chaudron	M	A	115	52
MR-ASP-108S	30	France	Reunion Island	Saint Denis	Chaudron	M	A	126	64
MR-ASP-111S	31	France	Reunion Island	Etang-Sale	Les Sables	F	A	117	58
MR-ASP-115S	32	France	Reunion Island	Le Port	Le Port	M	A	131	77
MR-ASP-116S	33	France	Reunion Island	Le Port	Le Port	F	A	112	39
MR-ASP-118S	34	France	Reunion Island	Saint Paul	Saint Paul	M	A	130	75
MR-ASP-119S	35	France	Reunion Island	Saint Paul	Saint Paul	M	A	131	71
MR-ASP-120S	36	France	Reunion Island	Saint Paul	Saint Paul	F	A	113	44
MR-ASP-121S	37	France	Reunion Island	Saint Paul	Saint Paul	F	A	111	43
MR-ASP-125S	38	France	Reunion Island	Cambaie	Saint Paul	M	A	128	71
MR-ASP-127S	39	France	Reunion Island	Saint Denis	Moufia	F	A	105	34
MR-ASP-132S	40	France	Reunion Island	Saint Gilles	Saint Gilles	F	A	105	39
MR-ASP-133S	41	France	Reunion Island	Saint Gilles	Saint Gilles	F	A	109	42
MR-ASP-134S	42	France	Reunion Island	Saint Gilles	Saint Gilles	M	A	120	62
MR-ASP-135S	43	France	Reunion Island	Saint Gilles	Saint Gilles	F	A	107	36
MR-ASP-136S	44	France	Reunion Island	Saint Gilles	L'Ermitage	F	A	102	37
MR-ASP-137S	45	France	Reunion Island	Saint Gilles	L'Ermitage	M	A	112	40
MR-ASP-138S	46	France	Reunion Island	Saint Gilles	Saint Gilles	F	A	113	41
MR-ASP-139S	47	France	Reunion Island	Saint Gilles	Saint Gilles	M	A	135	86
MR-ASP-140S	48	France	Reunion Island	Saint Gilles	Saint Gilles	F	A	105	36
MR-ASP-143S	49	France	Reunion Island	Le Port	Le Port	F	A	85	17
MR-ASP-144S	50	France	Reunion Island	Le Port	Le Port	F	A	97	25
MR-ASP-147S	51	France	Reunion Island	Les Avirons	Les Avirons	M	A	128	51
MR-ASP-150S	52	France	Reunion Island	Saint Philippe	Basse Vallee	F	A	112	43
MR-ASP-152S	53	France	Reunion Island	Saint Pierre	La Cafrine	M	A	135	83
MR-ASP-154S	54	France	Reunion Island	Saint Pierre	La Cafrine	M	A	116	39
MR-ASP-155S	55	France	Reunion Island	Saint Denis	Moufia	F	A	129	43
MR-ASP-157S	56	France	Reunion Island	Saint Denis	La Montagne	F	A	116	56
MR-ASP-158S	57	France	Reunion Island	Cilaos	Cilaos	F	A	110	41
MR-ASP-161S	58	France	Reunion Island	Cilaos	Cilaos	F	A	101	31
MR-ASP-162S	59	France	Reunion Island	Cilaos	Cilaos	F	A	101	33
MR-ASP-163S	60	France	Reunion Island	Cilaos	Cilaos	F	A	110	44
MR-ASP-170S	61	France	Reunion Island	Sainte Rose	Sainte Rose	F	A	116	46
MR-ASP-171S	62	France	Reunion Island	Sainte Rose	Sainte Rose	M	A	138	80
MR-ASP-173S	63	France	Reunion Island	La Possession	La Possession	F	A	112	40
MR-ASP-178S	64	France	Reunion Island	La Possession	Sainte Therese	M	A	139	82
MR-ASP-181S	65	France	Reunion Island	La Possession	La Possession	M	A	111	40
MR-ASP-183S	66	France	Reunion Island	Saint Paul	Riviere des Galets	M	A	141	89

## Sheet: Animal FO
Table S2. Frequency of Occurrence (FO) of each animal OTU, using the COI primers
Kingdom	Phylum	Class	Order	Family	OTU	FO (%)
Animalia	Annelida	Clitellata	Crassiclitellata	Megascolecidae	Amynthas rodericensis	3.39
Animalia	Annelida	Clitellata	Crassiclitellata	Megascolecidae	Travoscolides chengannures	1.69
Animalia	Annelida	Clitellata	Crassiclitellata	Rhinodrilidae	Pontoscolex corethrurus	1.69
Animalia	Arthropoda	Arachnida	Araneae	Lycosidae	Trochosa sp.1	3.39
Animalia	Arthropoda	Arachnida	Araneae	Oecobiidae	Oecobius putus	1.69
Animalia	Arthropoda	Arachnida	Araneae	Salticidae	Menemerus bivittatus	1.69
Animalia	Arthropoda	Arachnida	Araneae	Salticidae	Plexippus paykulli	1.69
Animalia	Arthropoda	Arachnida	Araneae	Sparassidae	Heteropoda venatoria	1.69
Animalia	Arthropoda	Arachnida	Araneae	Theridiidae	Latrodectus geometricus	1.69
Animalia	Arthropoda	Arachnida	Araneae	Theridiidae	Theridion melanostictum	1.69
Animalia	Arthropoda	Diplopoda	Polydesmida	Paradoxosomatidae	Somethus sp.1	3.39
Animalia	Arthropoda	Diplopoda	Spirobolida	Trigoniulidae	Leptogoniulus sorornus	6.78
Animalia	Arthropoda	Insecta	Blattodea	Blaberidae	Pycnoscelus sp.1	3.39
Animalia	Arthropoda	Insecta	Blattodea	Blaberidae	Pycnoscelus surinamensis	6.78
Animalia	Arthropoda	Insecta	Blattodea	Blattellidae	Blattella lituricollis	6.78
Animalia	Arthropoda	Insecta	Coleoptera	Chrysomelidae	Bruchidius sp.1	1.69
Animalia	Arthropoda	Insecta	Coleoptera	Coccinellidae	Coccinella septempunctata	1.69
Animalia	Arthropoda	Insecta	Coleoptera	Coccinellidae	Exochomus laeviusculus	15.25
Animalia	Arthropoda	Insecta	Coleoptera	Coccinellidae	Platynaspis capicola	1.69
Animalia	Arthropoda	Insecta	Coleoptera	Curculionidae	Coccotrypes cyperi	1.69
Animalia	Arthropoda	Insecta	Coleoptera	Nitidulidae	Carpophilus sp.2	1.69
Animalia	Arthropoda	Insecta	Coleoptera	Scarabaeidae	Protaetia sp.1	1.69
Animalia	Arthropoda	Insecta	Coleoptera	Tenebrionidae	Gonocephalum sp.1	1.69
Animalia	Arthropoda	Insecta	Coleoptera	Tenebrionidae	Myrmechixenus vaporariorum	5.08
Animalia	Arthropoda	Insecta	Coleoptera	Tenebrionidae	Tenebrionidae 2	6.78
Animalia	Arthropoda	Insecta	Coleoptera	Tenebrionidae	Tenebrionidae 3	6.78
Animalia	Arthropoda	Insecta	Diptera	Calliphoridae	Chrysomya megacephala	6.78
Animalia	Arthropoda	Insecta	Diptera	Calliphoridae	Lucilia cuprina	1.69
Animalia	Arthropoda	Insecta	Diptera	Dolichopodidae	Dolichopodidae 2	1.69
Animalia	Arthropoda	Insecta	Diptera	Mycetophilidae	Allactoneura sp.1	1.69
Animalia	Arthropoda	Insecta	Diptera	Tephritidae	Coelotrypes sp.1	1.69
Animalia	Arthropoda	Insecta	Diptera	Ulidiidae	Physiphora sp.2	1.69
Animalia	Arthropoda	Insecta	Hemiptera	Cicadellidae	Glossocratus afzelii	1.69
Animalia	Arthropoda	Insecta	Hemiptera	Issidae	Euroxenus vayssieresi	1.69
Animalia	Arthropoda	Insecta	Hemiptera	Miridae	Deraeocoris cf. howanus	1.69
Animalia	Arthropoda	Insecta	Hemiptera	Rhopalidae	Liorhyssus hyalinus	1.69
Animalia	Arthropoda	Insecta	Hemiptera	Rhyparochromidae	Rhyparochromidae 2	1.69
Animalia	Arthropoda	Insecta	Hemiptera	Rhyparochromidae	Rhyparochromidae 3	5.08
Animalia	Arthropoda	Insecta	Hemiptera	Rhyparochromidae	Rhyparochromidae 6	1.69
Animalia	Arthropoda	Insecta	Hemiptera	Tropiduchidae	Kallitaxila sinica	3.39
Animalia	Arthropoda	Insecta	Hymenoptera	Apidae	Apis mellifera	18.64
Animalia	Arthropoda	Insecta	Hymenoptera	Formicidae	Brachymyrmex cordemoyi	11.86
Animalia	Arthropoda	Insecta	Hymenoptera	Formicidae	Formicidae 1	1.69
Animalia	Arthropoda	Insecta	Hymenoptera	Formicidae	Monomorium subopacum	1.69
Animalia	Arthropoda	Insecta	Hymenoptera	Formicidae	Nylanderia bourbonica	5.08
Animalia	Arthropoda	Insecta	Hymenoptera	Formicidae	Paratrechina longicornis	49.15
Animalia	Arthropoda	Insecta	Hymenoptera	Formicidae	Pheidole megacephala	6.78
Animalia	Arthropoda	Insecta	Hymenoptera	Formicidae	Solenopsis geminata	8.47
Animalia	Arthropoda	Insecta	Hymenoptera	Formicidae	Technomyrmex albipes	3.39
Animalia	Arthropoda	Insecta	Hymenoptera	Formicidae	Technomyrmex pallipes	1.69
Animalia	Arthropoda	Insecta	Hymenoptera	Formicidae	Technomyrmex vitiensis	5.08
Animalia	Arthropoda	Insecta	Hymenoptera	Formicidae	Tetramorium bicarinatum	3.39
Animalia	Arthropoda	Insecta	Hymenoptera	Vespidae	Polistes olivaceus	3.39
Animalia	Arthropoda	Insecta	Hymenoptera	Vespidae	Polistes wattii	6.78
Animalia	Arthropoda	Insecta	Lepidoptera	Cosmopterigidae	Cosmopterigidae 1	1.69
Animalia	Arthropoda	Insecta	Lepidoptera	Crambidae	Crambidae 1	1.69
Animalia	Arthropoda	Insecta	Lepidoptera	Crambidae	Herpetogramma licarsisalis	1.69
Animalia	Arthropoda	Insecta	Lepidoptera	NA	Lepidoptera 2	1.69
Animalia	Arthropoda	Insecta	Lepidoptera	NA	Lepidoptera 3	6.78
Animalia	Arthropoda	Insecta	Lepidoptera	Sphingidae	Hippotion celerio	1.69
Animalia	Arthropoda	Insecta	Lepidoptera	Tineidae	Opogona sp.1	1.69
Animalia	Arthropoda	Insecta	Orthoptera	Gryllidae	Gryllodes sp.1	1.69
Animalia	Arthropoda	Insecta	Orthoptera	Tettigoniidae	Tettigoniidae 1	1.69
Animalia	Arthropoda	Insecta	Thysanoptera	Thripidae	Frankliniella schultzei	1.69
Animalia	Arthropoda	Malacostraca	Isopoda	Philosciidae	Philosciidae 1	1.69
Animalia	Arthropoda	Malacostraca	Isopoda	Porcellionidae	Porcellionides pruinosus	3.39
Animalia	Arthropoda	NA	NA	NA	Arthropoda 1	5.08
Animalia	Chordata	Lepidosauria	Squamata	Gekkonidae	Hemidactylus frenatus	1.69

## Sheet: Plant FO
Table S3. Frequency of Occurrence (FO) of each plant OTU, using the TRNL primers
Kingdom	Phylum	Class	Order	Family	OTU	FO (%)
Plantae	Streptophyta	Magnoliopsida	Apiales	Apiaceae	Apiaceae 1	1.47
Plantae	Streptophyta	Magnoliopsida	Apiales	Apiaceae	Centella asiatica	2.94
Plantae	Streptophyta	Magnoliopsida	Apiales	Apiaceae	Centella sp.	1.47
Plantae	Streptophyta	Magnoliopsida	Arecales	Arecaceae	Arecaceae 4	1.47
Plantae	Streptophyta	Magnoliopsida	Asterales	Asteraceae	Asteraceae 1	7.35
Plantae	Streptophyta	Magnoliopsida	Asterales	Asteraceae	Asteraceae 2	8.82
Plantae	Streptophyta	Magnoliopsida	Asterales	Asteraceae	Asteraceae 3	2.94
Plantae	Streptophyta	Magnoliopsida	Asterales	Asteraceae	Asteraceae 5	1.47
Plantae	Streptophyta	Magnoliopsida	Asterales	Asteraceae	Asteraceae 8	4.41
Plantae	Streptophyta	Magnoliopsida	Asterales	Asteraceae	Asteraceae 9	5.88
Plantae	Streptophyta	Magnoliopsida	Asterales	Asteraceae	Zinnia sp.	1.47
Plantae	Streptophyta	Magnoliopsida	Asterales	Asteroideae	Emilia sp.	2.94
Plantae	Streptophyta	Magnoliopsida	Asterales	NA	Asterales	1.47
Plantae	Streptophyta	Magnoliopsida	Boraginale	Ehretiaceae	Ehretiaceae	7.35
Plantae	Streptophyta	Magnoliopsida	Brassicales	Brassicaceae	Brassica sp.	1.47
Plantae	Streptophyta	Magnoliopsida	Brassicales	NA	Brassicales 1	2.94
Plantae	Streptophyta	Magnoliopsida	Caryophyllales	Polygonaceae	Polygonaceae 1	1.47
Plantae	Streptophyta	Magnoliopsida	Commelinales	Commelinaceae	Commelina benghalensis	1.47
Plantae	Streptophyta	Magnoliopsida	Curcurbitales	Begoniaceae	Begonia sp.	2.94
Plantae	Streptophyta	Magnoliopsida	Ericales	Actinidiaceae	Actinidia sp.	1.47
Plantae	Streptophyta	Magnoliopsida	Ericales	Balsaminaceae	Balsaminaceae	1.47
Plantae	Streptophyta	Magnoliopsida	Ericales	Balsaminaceae	Impatiens sp.	1.47
Plantae	Streptophyta	Magnoliopsida	Fabales	Fabaceae	Abrus sp.	1.47
Plantae	Streptophyta	Magnoliopsida	Fabales	Fabaceae	Crotalaria sp.	1.47
Plantae	Streptophyta	Magnoliopsida	Fabales	Fabaceae	Desmanthus sp.	2.94
Plantae	Streptophyta	Magnoliopsida	Fabales	Fabaceae	Desmodium scorpiurus	13.24
Plantae	Streptophyta	Magnoliopsida	Fabales	Fabaceae	Desmodium sp.	1.47
Plantae	Streptophyta	Magnoliopsida	Fabales	Fabaceae	Fabaceae 11	2.94
Plantae	Streptophyta	Magnoliopsida	Fabales	Fabaceae	Fabaceae 2	8.82
Plantae	Streptophyta	Magnoliopsida	Fabales	Fabaceae	Fabaceae 3	5.88
Plantae	Streptophyta	Magnoliopsida	Fabales	Fabaceae	Fabaceae 4	22.06
Plantae	Streptophyta	Magnoliopsida	Fabales	Fabaceae	Fabaceae 5	5.88
Plantae	Streptophyta	Magnoliopsida	Fabales	Fabaceae	Fabaceae 6	2.94
Plantae	Streptophyta	Magnoliopsida	Fabales	Fabaceae	Fabaceae 7	1.47
Plantae	Streptophyta	Magnoliopsida	Fabales	Fabaceae	Fabaceae 9	1.47
Plantae	Streptophyta	Magnoliopsida	Fabales	Fabaceae	Pithecellobium sp.1	2.94
Plantae	Streptophyta	Magnoliopsida	Fabales	Fabaceae	Tachigali sp.	4.41
Plantae	Streptophyta	Magnoliopsida	Fabales	NA	Fabales	1.47
Plantae	Streptophyta	Magnoliopsida	Fagales	Betulaceae	Betula sp.	1.47
Plantae	Streptophyta	Magnoliopsida	Fagales	Casuarinaceae	Casuarinaceae	1.47
Plantae	Streptophyta	Magnoliopsida	Gentianales	Apocynaceae	Apocynaceae 1	2.94
Plantae	Streptophyta	Magnoliopsida	Gentianales	Apocynaceae	Apocynaceae 2	1.47
Plantae	Streptophyta	Magnoliopsida	Gentianales	Apocynaceae	Catharanthus roseus	1.47
Plantae	Streptophyta	Magnoliopsida	Gentianales	Apocynaceae	Tabernaemontana sp.	1.47
Plantae	Streptophyta	Magnoliopsida	Gentianales	Apocynaceae	Thevetia sp.	1.47
Plantae	Streptophyta	Magnoliopsida	Gentianales	Rubiaceae	Rubiaceae 1	1.47
Plantae	Streptophyta	Magnoliopsida	Lamiales	Acanthaceae	Acanthaceae 1	10.29
Plantae	Streptophyta	Magnoliopsida	Lamiales	Acanthaceae	Ruellia sp.	1.47
Plantae	Streptophyta	Magnoliopsida	Lamiales	Bignoniaceae	Bignoniaceae 2	1.47
Plantae	Streptophyta	Magnoliopsida	Lamiales	Bignoniaceae	Bignoniaceae 4	2.94
Plantae	Streptophyta	Magnoliopsida	Lamiales	Linderniaceae	Linderniaceae	1.47
Plantae	Streptophyta	Magnoliopsida	Lamiales	Plantaginaceae	Plantaginaceae 1	1.47
Plantae	Streptophyta	Magnoliopsida	Lamiales	Verbenaceae	Duranta sp.	1.47
Plantae	Streptophyta	Magnoliopsida	Lamiales	Verbenaceae	Verbenaceae 2	2.94
Plantae	Streptophyta	Magnoliopsida	Laurales	Lauraceae	Lauraceae 1	2.94
Plantae	Streptophyta	Magnoliopsida	Magnoliales	Annonaceae	Annonaceae 1	1.47
Plantae	Streptophyta	Magnoliopsida	Malpighiales	Euphorbiaceae	Euphorbiaceae 1	1.47
Plantae	Streptophyta	Magnoliopsida	Malpighiales	Euphorbiaceae	Euphorbiaceae 2	1.47
Plantae	Streptophyta	Magnoliopsida	Malpighiales	Euphorbiaceae	Euphorbiaceae 6	1.47
Plantae	Streptophyta	Magnoliopsida	Malpighiales	Euphorbiaceae	Euphorbiaceae 7	1.47
Plantae	Streptophyta	Magnoliopsida	Malpighiales	Euphorbiaceae	Ricinus communis	1.47
Plantae	Streptophyta	Magnoliopsida	Malpighiales	Passifloraceae	Passifloraceae 1	2.94
Plantae	Streptophyta	Magnoliopsida	Malpighiales	Passifloraceae	Turnera sp.1	5.88
Plantae	Streptophyta	Magnoliopsida	Malpighiales	Passifloraceae	Turnera sp.2	7.35
Plantae	Streptophyta	Magnoliopsida	Malpighiales	Phyllanthaceae	Phyllanthaceae 1	1.47
Plantae	Streptophyta	Magnoliopsida	Malvales	Malvaceae	Hibiscus sp.	1.47
Plantae	Streptophyta	Magnoliopsida	Malvales	Malvaceae	Malvaceae 1	2.94
Plantae	Streptophyta	Magnoliopsida	Malvales	Malvaceae	Sida sp.2	1.47
Plantae	Streptophyta	Magnoliopsida	Myrtales	Combretaceae	Combretaceae	1.47
Plantae	Streptophyta	Magnoliopsida	Myrtales	Myrtaceae	Metrosideros sp.1	1.47
Plantae	Streptophyta	Magnoliopsida	Myrtales	Myrtaceae	Myrtaceae 1	1.47
Plantae	Streptophyta	Magnoliopsida	Myrtales	Myrtaceae	Myrtaceae 4	1.47
Plantae	Streptophyta	Magnoliopsida	Oxalidales	Oxalidaceae	Oxalis sp.1	4.41
Plantae	Streptophyta	Magnoliopsida	Oxidales	Oxalidaceae	Oxalis sp.2	4.41
Plantae	Streptophyta	Magnoliopsida	Poales	Poaceae	Cynodon dactylon	1.47
Plantae	Streptophyta	Magnoliopsida	Poales	Poaceae	Digitaria sp.1	2.94
Plantae	Streptophyta	Magnoliopsida	Poales	Poaceae	Eragrostis sp.	1.47
Plantae	Streptophyta	Magnoliopsida	Poales	Poaceae	Poaceae 1	4.41
Plantae	Streptophyta	Magnoliopsida	Poales	Poaceae	Poaceae 10	5.88
Plantae	Streptophyta	Magnoliopsida	Poales	Poaceae	Poaceae 4	1.47
Plantae	Streptophyta	Magnoliopsida	Poales	Poaceae	Poaceae 9	1.47
Plantae	Streptophyta	Magnoliopsida	Polypodiales	Pteridaceae	Pteridaceae	1.47
Plantae	Streptophyta	Magnoliopsida	Rosales	Cannabaceae	Cannabaceae 1	1.47
Plantae	Streptophyta	Magnoliopsida	Rosales	Moraceae	Ficus sp.1	4.41
Plantae	Streptophyta	Magnoliopsida	Rosales	Rhamnaceae	Rhamnaceae	1.47
Plantae	Streptophyta	Magnoliopsida	Rosales	Rosaceae	Rubus sp.1	1.47
Plantae	Streptophyta	Magnoliopsida	Sapindales	Anacardiaceae	Anacardiaceae 1	8.82
Plantae	Streptophyta	Magnoliopsida	Sapindales	Anacardiaceae	Anacardiaceae 4	1.47
Plantae	Streptophyta	Magnoliopsida	Sapindales	Anacardiaceae	Schinus terebinthifolia	1.47
Plantae	Streptophyta	Magnoliopsida	Sapindales	Rutaceae	Rutaceae 1	2.94
Plantae	Streptophyta	Magnoliopsida	Sapindales	Sapindaceae	Sapindaceae 1	1.47
Plantae	Streptophyta	Magnoliopsida	Solanales	Convolvulaceae	Ipomoea sp.	2.94
Plantae	Streptophyta	Magnoliopsida	Solanales	Solanaceae	Solanaceae 1	4.41
Plantae	Streptophyta	Magnoliopsida	Solanales	Solanaceae	Solanaceae 2	25.00
Plantae	Streptophyta	Magnoliopsida	Vitales	Leeaceae	Leea sp.	1.47
Plantae	Streptophyta	Magnoliopsida	Vitales	Vitaceae	Cissus sp.	2.94
Plantae	Streptophyta	Magnoliopsida	Zingiberales	Musaceae	Musa sp.1	1.47
